# Supplementary material for: The ‘miracle cure’: how do primary care physicians prescribe physical activity with the aim of improving clinical outcomes of chronic disease? A scoping review
Source: HighWire-hosted journal article supplement (doi:10.1136/bmjsem-2022-001373), 2022-08-01
Supplement: bmjsem-2022-001373supp002_data_supplement.pdf [file bmjsem-2022-001373supp002_data_supplement.pdf]

Table 1. Characteristics of PCP-led physical activity prescriptions for patients with chronic disease

| Author, Year, Location            | Study Design | Length of Intervention                            | Follow up; with whom                                          | Sample Size, Chronic Condition and Sex/Gender                                                                                      | Brief Study Description – PCP Role                                                                                                                                                  | Personalized or Generic Intervention                                                                                                                                        | Primary Health Outcome                  | Main Health Outcome Findings                                                                                                                                                                   |
|-----------------------------------|--------------|---------------------------------------------------|---------------------------------------------------------------|------------------------------------------------------------------------------------------------------------------------------------|-------------------------------------------------------------------------------------------------------------------------------------------------------------------------------------|-----------------------------------------------------------------------------------------------------------------------------------------------------------------------------|-----------------------------------------|------------------------------------------------------------------------------------------------------------------------------------------------------------------------------------------------|
| Avram et al., 2011, Romania       | RCT          | 18 months with outcomes measured at study end.    | Every 6 months in person and once a month over the phone; PCP | 253 (133 IG, 120 UC), high cardiometabolic risk<br>Age: IG-55.6; UC-56.5<br><br>IG-62% male, 38% female; UC-64% male, 36% female   | PCP provided lifestyle counselling and a monthly follow up call for 18 months. PCPs also received counselling training from a team including a cardiologist, diabetologist, and PT. | <b>Personalized:</b> PCP provided 3 90-minute visits to discuss lifestyle habits (diet, PA, weight control).                                                                | Weight                                  | <b>Positive Change:</b> Significant decrease in risk profile (decreased waist circumference and weight) in IG.                                                                                 |
| Boveda-Fontan et al., 2015, Spain | RCT          | 1 year with assessments at 2, 4, 8 and 12 months. | 2, 4, 8 and 12 months; PCP                                    | 277 (107 IG, 120 UC), uncontrolled dyslipidemia<br>Age: IG-52.83; UC-52.84<br><br>IG-42% male, 58% female; UC-35% male, 65% female | PCPs delivered MI or general recommendations to reduce unhealthy habits into their already scheduled appointments.                                                                  | <b>Personalized:</b> Patients in the IG received general recommendations (same as UC), as well as an MI approach to increase daily PA.                                      | Lipid levels                            | <b>Positive Change:</b> After 12 months, total cholesterol levels, LDL-cholesterol, and triglycerides improved from baseline in IG. More patients achieved target lipid control in IG than UC. |
| Bolognesi et al., 2006, Italy     | RCT          | 5-6 months with assessments at study end.         | 5-6 months by mail or by phone; Counsellor.                   | 96 (48 IG, 48 UC), obesity<br><br>IG-46% male; 44% female; UC-37% male, 53% female                                                 | PCP assessed BMI, recruited participants., provided brief counselling and PA recommendations using PACE protocol.                                                                   | <b>Personalized:</b> PCP determined stage of change using PACE assessment tool and provided PA recommendations.                                                             | BMI and abdominal girth                 | <b>Positive Change:</b> After 6 months, BMI and abdominal girth significantly decreased in IG.                                                                                                 |
| De Greef et al., 2011, Belgium    | RCT          | 12 weeks with outcomes measured at study end.     | 12 weeks; PCP.                                                | 67 (24 UC, CBT 22, CBT+PCP counselling 21), type 2 diabetes<br>Age: 67.4<br><br>61% male, 29% female                               | PCPs delivered 3 15-minute PA counselling sessions, plus 3 90-minute CBT sessions to increase activity.                                                                             | <b>Personalized:</b> PCP helped set PA goals using pedometer. Participants assigned to group counselling discussed behaviour change strategies with a clinical psychologist | Cholesterol, waist circumference, HbA1c | <b>Positive Change:</b> Participants who received PCP counselling had a decrease in waist circumference and HbA1c, and lower increase in total cholesterol.                                    |

|                             |     |                                                      |                                                           |                                                                                                                                                                                                      |                                                                                                                                                                                                                                                                         |                                                                                                                                                                                                                                                |                                                  |                                                                                                                                     |
|-----------------------------|-----|------------------------------------------------------|-----------------------------------------------------------|------------------------------------------------------------------------------------------------------------------------------------------------------------------------------------------------------|-------------------------------------------------------------------------------------------------------------------------------------------------------------------------------------------------------------------------------------------------------------------------|------------------------------------------------------------------------------------------------------------------------------------------------------------------------------------------------------------------------------------------------|--------------------------------------------------|-------------------------------------------------------------------------------------------------------------------------------------|
| Miura et al., 2004, Japan   | RCT | 24 weeks                                             | Every 4 weeks; PCP and counselor.                         | 57 (18 PA Prescription+PCP Counselling, 20 PA Prescription, 19 Matched-UC), hypertension<br><br>Age: UC-64.0; PA Prescription – 61.0; Prescription+PCP Counselling – 60.0<br><br>7% male, 93% female | PCP provided counselling sessions via PACE+ protocol at baseline and follow up.                                                                                                                                                                                         | <b>Personalized:</b> PCPs assessed baseline lifestyle behaviours and provided a PA prescription. The Prescription+PCP GROUP also received 20-minute follow up sessions with their PCP throughout the intervention to review their action plan. | Blood pressure, percent body fat                 | <b>Positive Change:</b> Decrease in systolic blood pressure in the IGs. Body fat percentage and sodium were higher in the IGs.      |
| Olsson et al., 2015, Sweden | RCT | 6 months, with assessments at baseline and 6 months. | 6 months; Physical activity counselor                     | 101 (47 IG, 54 UC), obesity<br>Age: 67.5<br><br>43% male, 57% female                                                                                                                                 | UC received written PA advice. IG received the advice and a 30-minute counselling session with a PCP trained in MI who provided PA advice by using the FIIT framework to provide a prescription. Both groups received a letter from the PCP with their PA prescription. | <b>Personalized:</b> IG received personalized PA prescription during a MI session. At 1 month PCP also delivered a general group session to increase PA.                                                                                       | SF-36 scores and mental component summary scores | <b>Positive Change:</b> Significant improvement in general health (SF-36 scores) and mental health scores in the IG after 6 months. |
| Volger et al., 2013, USA    | RCT | 2 years                                              | Every 3 months; PCP and medical assistants.               | 390 (131 Brief, 129 Enhanced, 130 UC), obesity and at risk for MS<br><br>Age: 51.5<br><br>Sex/gender not reported                                                                                    | All participants received 7-minute brief lifestyle counselling from a PCP. IGs met monthly for 2 years with a medical assistant for further counselling. Enhanced group had options for meal replacements and medication.                                               | <b>Personalized:</b> Generic brief counselling session was provided to all participants. The IG groups had auxiliary sessions with a medical assistant with personalized lifestyle support.                                                    | Weight loss                                      | <b>Positive Change:</b> Both IGs lost more weight than the UC group, the enhanced group lost significantly more weight.             |
| Aizawa et al., 2009, Canada | OBS | 24 weeks with outcomes measured at 8 and 24 weeks.   | Follow up at 8 weeks and 24 weeks; PCP and research staff | 63 (29 without MS, 34 with MS), pre-hypertensive and/or pre-diabetes.<br>Age: without MS-54.3; with MS-53.5                                                                                          | PCP provided individually customized lifestyle prescriptions for aerobic exercise and a Mediterranean-style diet. Prescriptions were                                                                                                                                    | <b>Personalized:</b> PCP provided PA prescription via STEP. Intensity determined by heart rate. PCP recommended                                                                                                                                | Central artery stiffness                         | <b>Positive Change:</b> Carotid artery dispensability significantly increased, with improvements in MS components (BP,              |

|                               |     |                                                                                                            |                                         |                                                                                                  |                                                                                                                                                                                                                                                                                                                                            |                                                                                                                                                                                        |                                                                                 |                                                                                                                                      |
|-------------------------------|-----|------------------------------------------------------------------------------------------------------------|-----------------------------------------|--------------------------------------------------------------------------------------------------|--------------------------------------------------------------------------------------------------------------------------------------------------------------------------------------------------------------------------------------------------------------------------------------------------------------------------------------------|----------------------------------------------------------------------------------------------------------------------------------------------------------------------------------------|---------------------------------------------------------------------------------|--------------------------------------------------------------------------------------------------------------------------------------|
|                               |     |                                                                                                            |                                         | 47% male, 53% female                                                                             | provided by the Step Test Exercise Prescription, which uses stepping time (20 times stepping with 9.5cm step) and heart rate to predict maximal oxygen uptake and 75% or predicted VO <sub>2</sub> max, and stage of change model. MS components and carotid artery stiffness was measured at baseline and after 24 weeks of intervention. | appropriate serving size and Mediterranean-style diet. Using the 'stage of change' model, PCP counseled patient to incorporate PA in daily lifestyle.                                  |                                                                                 | fasting glucose, waist circumference) in participants with MS.                                                                       |
| Bertozi et al., 2004, Italy   | OBS | 7 months, with outcomes measured at study end                                                              | 7 months (median); unclear if with PCP. | 145, at risk for obesity<br>Age: 51.6<br><br>38% male, 62% female                                | PCP provided brief counselling using PACE to increase PA.                                                                                                                                                                                                                                                                                  | <b>Personalized:</b> PCP assessed motivational level towards PA and then provided advice to increase PA.                                                                               | Motivation to increase PA. Secondary outcomes: BMI, and abdominal circumference | <b>Positive Change:</b> After 7 months, BMI and abdominal circumference decreased.                                                   |
| Filippi et al., 2017, Italy   | OBS | Approximately 54 months. Participants were randomly selected to be seen on 12 pre-determined working days. | After 12 months; PCP                    | 810 (405 IG, 40 Matched-UC), high blood cholesterol<br><br>Age: 55.5<br><br>43% male, 57% female | PCPs calculated and discussed cardiovascular risk, and provided a brief lifestyle counselling session to increase aerobic PA.                                                                                                                                                                                                              | <b>Personalized:</b> Based on cardiovascular risk, PCPs provided a 5-10 minute session on healthy eating and PA, handed out dietary pamphlets, and prescriptions of statins if needed. | Total cholesterol and global cardiovascular risk                                | <b>Positive Change:</b> After 54 months, total cholesterol and global cardiovascular risk decreased in IG as compared to matched-UC. |
| Lohmann et al., 2010, Denmark | OBS | 18 months with outcomes measured at 3, 6, 8, 12, 15, and 18 months.                                        | Every 3 months; PCP                     | 127, type 2 diabetes<br><br>Age 67.5<br><br>58% male, 42% female                                 | Two fitness consultations every 3 months. One consultation included a fitness assessment and the second was MI with a PCP to review the assessment results.                                                                                                                                                                                | <b>Personalized:</b> The PCP assessed their stage of change, and then using MI to provide PA advice.                                                                                   | HDL-cholesterol, HbA1c                                                          | <b>Positive Change:</b> HDL cholesterol levels increased, and HbA1c levels were unchanged and low.                                   |
|                               |     |                                                                                                            |                                         |                                                                                                  |                                                                                                                                                                                                                                                                                                                                            |                                                                                                                                                                                        |                                                                                 |                                                                                                                                      |

|                                      |     |                                                                             |                      |                                                                                                                                                                                                                              |                                                                                                                                                                                                                                                                                                                                                                                                                                                                                                   |                                                                                                                                                       |                                  |                                                                                                                                                                                     |
|--------------------------------------|-----|-----------------------------------------------------------------------------|----------------------|------------------------------------------------------------------------------------------------------------------------------------------------------------------------------------------------------------------------------|---------------------------------------------------------------------------------------------------------------------------------------------------------------------------------------------------------------------------------------------------------------------------------------------------------------------------------------------------------------------------------------------------------------------------------------------------------------------------------------------------|-------------------------------------------------------------------------------------------------------------------------------------------------------|----------------------------------|-------------------------------------------------------------------------------------------------------------------------------------------------------------------------------------|
| Chambers et al., 2000, UK            | RCT | 1 year with outcomes measured at study end.                                 | No follow up         | 386 (UC 94, PA booklet 99, PA booklet+PT session 97, PA booklet+PT session+group fitness 96),<br>One of the following: ischemic heart disease, stroke, hypertension or diabetes<br><br>Age: 61.0<br><br>54% male, 46% female | UC received no PA-related information, PA booklet group received a booklet with information about the benefits of PA, PA booklet+PT session received the booklet about the benefits of PA and a fitness assessment with a PT, booklet+PT session+group fitness received the same benefits of PA booklet, a fitness assessment with a PT and access to 4 group fitness sessions. For all IGs, the booklet discussing PA benefits was sent with an accompanying letter encouraging PA from the PCP. | <b>Generic:</b> PCP mailed letters with PA-related information to all groups. Two groups also had one session with PT and access to group fitness.    | SF-36                            | <b>No change:</b> Social functioning and bodily pain deterioration was reported in the UC group only, whereas no change of trends towards improved scores were observed in the IGs. |
| van Sluijs et al., 2005, Netherlands | RCT | 1 year with outcomes measured at baseline, 8 weeks, 6 months and 12 months. | 4 weeks; PCP         | 396 (IG 191, 205 UC),<br>hypercholesterolemia, or NIDDM or hypertension<br><br>Age: 55.5<br><br>50% male, 50% female                                                                                                         | Using PACE, PCPs (or nurse) provided a 10-minute counselling session. IG received telephone counselling after 2 weeks (with a PA counsellor), a follow up with the PCP after 4 weeks, and a booster call after 8 weeks after the second visit.                                                                                                                                                                                                                                                    | <b>Personalized:</b> The IG had a follow up session with their PCP after 4 weeks since initial discussion. For the IG the PCP used the PACE protocol. | BMI and waist circumference.     | <b>No change:</b> No change in BMI and waist circumference increased in the IG.                                                                                                     |
| Serrano Ripoll et al., 2015, Spain   | RCT | 1 year, with outcomes measured at 6 and 12 months                           | 6 and 12 months; PCP | 273 (140 IG, 133 UC), mild-moderate depressive symptoms<br><br>Age: 52 (median)                                                                                                                                              | PCPs provided a written prescription to improve health behaviours, including going for daily walks. UC received a less                                                                                                                                                                                                                                                                                                                                                                            | <b>Generic:</b> PCP completed initial screening for depression and reinforced the written                                                             | Beck Depression Inventory scores | <b>Unclear/Mixed:</b> At 12 month follow up, both groups had decreased depressive symptoms, with no differences between groups.                                                     |

|                        |     |        |                                                                  |                                                                                 |                                                                                                                                                                                                                                                     |                                                                                                                 |                                                                                                                                                                                            |                                                                                                                                                                                                                                                                                                                                                                       |
|------------------------|-----|--------|------------------------------------------------------------------|---------------------------------------------------------------------------------|-----------------------------------------------------------------------------------------------------------------------------------------------------------------------------------------------------------------------------------------------------|-----------------------------------------------------------------------------------------------------------------|--------------------------------------------------------------------------------------------------------------------------------------------------------------------------------------------|-----------------------------------------------------------------------------------------------------------------------------------------------------------------------------------------------------------------------------------------------------------------------------------------------------------------------------------------------------------------------|
|                        |     |        |                                                                  | 18% male, 82% female                                                            | detailed lifestyle prescription.                                                                                                                                                                                                                    | prescription including going for daily walks.                                                                   |                                                                                                                                                                                            |                                                                                                                                                                                                                                                                                                                                                                       |
| Lord & Green, 1995, UK | OBS | 1 year | 10 weeks, 6 and 10 months; Community health and fitness officer. | 419, at risk for cardiovascular disease<br><br>25% male, 68% female, 7% unknown | Pilot included optional exercise classes (e.g., dance, swimming, walking, bowling) for 3 sessions per week for 10 weeks. PCPs provided referral and indicated on the referral if there are any exercises that were contraindicated for the patient. | <b>Generic:</b> PCP assessed whether patient would be eligible for scheme and provided referral to the program. | Primary outcome was adherence. Participants could indicate their main reason for wanting to join the program and outcomes were assessed accordingly. The most common goal was weight loss. | <b>Unclear/Mixed:</b> Adherence to the program was low with only 20% attending classes for 10 weeks. Adherence to follow up was low, of those who returned for follow up and adhered to the 10-week program (n=44) average weight loss was 1kg and there was a 4 beat or more decrease in resting heart rate. Clinical or statistical significance were not reported. |

Mean age is presented. Sex/gender percentages are presented as reported by authors.

BMI – Body mass index; FIIT – Frequency, intensity, time, type; IG – Intervention group; MI – Motivational interviewing; MS – Metabolic syndrome; NIDDM - Non-insulin-dependent diabetes mellitus; PACE - patient-centered assessment and counseling for exercise; PCP - Primary care provider; PT – Physiotherapist; PA – Physical activity; SF-36 – 36-Item Short Form Survey; UC – Usual care
